# Supplementary material
Source: publisher figshare collection journal article supplement (https://tandf.figshare.com/articles/dataset/_/9785384)
Supplement: Supplementary file 1 [file 1]

**Location choices of face-to-face interactions in academic buildings: An experience sampling approach**

Minou Weijs-Perrée1*, Lorell Bück1, Rianne Appel-Meulenbroek1 and Theo Arentze1

*1Department Real Estate Management & Development, Eindhoven University of Technology, Eindhoven, The Netherlands*

*Corresponding Author:

Minou Weijs-Perrée

Department of the Built Environment, Eindhoven University of Technology

Vertigo 8.35, De Groene Loper 6

5600 MB Eindhoven, The Netherlands.

+31 40 247 5365

m.weijs.perree@tue.nl
